# Supplementary material for: Co-amplification of luminol-based electrochemiluminescence immunosensors based on multiple enzyme catalysis of bimetallic oxides CoCeOx and NiMnO3 for the detection of CYFRA21-1
Source: Royal Society of Chemistry journal article supplement (doi:10.1039/d3an00753g), 2023-01-01
Supplement: d3an00753g1.pdf [file d3an00753g1.pdf]

*Supplementary Materials*

**Co-amplification of luminol-based electrochemiluminescence  
immunosensor based on multiple enzyme catalysis of bimetallic oxides**

**CoCeO<sub>x</sub> and NiMnO<sub>3</sub> for the detection of CYFRA21-1**

Jingjing Zhang<sup>a, †</sup>, Min Li<sup>a, †</sup>, Jinglong Fang<sup>a</sup>, Caihong Wang<sup>b</sup>, Lei Liu<sup>a</sup>, Wei Cao<sup>\*a</sup>, Qin Wei<sup>\*a, c</sup>

<sup>a</sup> *Key Laboratory of Interfacial Reaction & Sensing Analysis in Universities of Shandong, School of Chemistry and Chemical Engineering, University of Jinan, Jinan 250022, P.R. China*

<sup>b</sup> *Department of Chemical Engineering and Safety, Binzhou University, Binzhou 256600, China*

<sup>c</sup> *Department of Chemistry, Sungkyunkwan University, Suwon, 16419, Republic of Korea*

<sup>#</sup> *Jingjing Zhang and Min Li contributed equally to this work.*

**\*Corresponding author.**

**Prof. Wei Cao**

**E-mail address:** chm\_caow@ujn.edu.cn, sdjndxwq@163.com.

## 1. Experiment section

### 1.1 Reagents and apparatuses

### 2. The calculation of the detection limit.

### 3. Preparation and storage of serum samples.

### 4. Figures and Table

**Fig. S1** elemental distribution images of CoCeO<sub>x</sub>@Au; (B) Ce element; (C) O element; (D) Co element; (E) Au element.

**Fig. S2** UV absorption spectra of NiMnO<sub>3</sub>@Au (black), UV absorption spectra of NiMnO<sub>3</sub>@Au-luminol (red), and UV absorption spectra of luminol (blue)

**Fig. S3** XPS spectra of the as-prepared CoCeO<sub>x</sub> composites. (A) Survey XPS spectra; (B) Ce(u': Ce<sup>3+</sup> 3d<sub>3/2</sub>; u'': Ce<sup>3+</sup> 3d<sub>5/2</sub>; v': Ce<sup>4+</sup> 3d<sub>3/2</sub>; v'': Ce<sup>4+</sup> 3d<sub>5/2</sub>) spectra; (C) Co spectra; and (D) O spectra.

**Fig. S4** (A) Color development reaction: No. 1 TMB solution; No. 2 CoCeO<sub>x</sub> solution; No. 3 color development reaction experiment without H<sub>2</sub>O<sub>2</sub>; No. 4 color development reaction experiment with H<sub>2</sub>O<sub>2</sub>; (B) Graph of the effect of CoCeO<sub>x</sub>@Au on luminol-H<sub>2</sub>O<sub>2</sub> system.

**Fig. S5** (A) Color development reaction: No. 1 TMB solution; No. 2 NiMnO<sub>3</sub> solution; No. 3 TMB+NiMnO<sub>3</sub> solution; (B) Color development reaction: No. 1 color development reaction experiment in air; No. 2 color development reaction experiment after passing 15 min N<sub>2</sub>; No. 3 color development reaction experiment after passing 30 N<sub>2</sub> for 30 min; (C) Color development reaction: No. 1 TMB solution; No. 2 color development reaction experiment without H<sub>2</sub>O<sub>2</sub> after passing 30 min N<sub>2</sub>; No. 3 color development reaction experiment with H<sub>2</sub>O<sub>2</sub> after passing 30 min N<sub>2</sub>.

**Fig. S6** Long-term stability of ECL immunosensor

**Table S1.** Comparison of the performance of the proposed and referenced immunosensor for CYFRA21-1 detection.

## 5. Reference

## 1. Experiment section

### 1.1 Reagents and apparatuses

Reagents : Cerium (III) nitrate hexahydrate ( $\text{Ce}(\text{NO}_3)_3 \cdot 6\text{H}_2\text{O}$ , 99.5%) and Manganese sulfate monohydrate ( $\text{MnSO}_4 \cdot \text{H}_2\text{O}$ , AR) were obtained from Aladdin Database Company (Shanghai, China). Cobalt (II) acetate tetrahydrate ( $(\text{CH}_3\text{COO})_2\text{Co} \cdot 4\text{H}_2\text{O}$ , 99.9%), nickel nitrate hexahydrate ( $\text{Ni}(\text{NO}_3)_2 \cdot 6\text{H}_2\text{O}$ ), terephthalic acid ( $\text{H}_2\text{BDC}$ , 99%), absolute ethanol ( $\text{C}_2\text{H}_5\text{OH}$ , 99.8%), potassium dihydrogen phosphate ( $\text{KH}_2\text{PO}_4$ ), disodium hydrogen phosphate ( $\text{Na}_2\text{HPO}_4$ ) Chloroauric acid ( $\text{HAuCl}_4$ , 1 %), and sodium borohydride ( $\text{NaBH}_4$ ) were obtained from Macklin Reagent Database Company (Beijing, China). N, N-dimethylformamide (DMF), were obtained from Sinopharm Reagent Database Corporation (Shanghai, China). potassium permanganate ( $\text{KMnO}_4$ ) was bought from Laiyang Economic and Technological Development Zone Fine Chemical Plant. urea ( $\text{CO}(\text{NH}_2)_2$ ) was purchased from Sinopharm Group Chemical Reagent Co., and Bovine serum albumin (BSA) (96 – 99%) was purchased from Sigma-Aldrich Corporation (St. Louis, MO, USA). Cytokeratin 19 fragment antigen (CYFRA21-1) and CYFRA21-1 antibody (Ab) were bought from Nanjing Kingsray Technology Co. Ultrapure water used for all experiments was purified by a purification system.

Apparatus: Electrochemical signals were recorded with a CHI 760D workstation (RST 5200F Zhengzhou Seris Instrument Technology Co., Ltd.). ECL signals were detected with an MPI-F electrochemiluminescence analyzer (Xi'an Re/Max Analytical Instruments Co., Ltd.). Scanning electron microscopy (SEM) images were obtained by a field emission scanning electron microscope (Zeiss, Germany). x-ray diffraction (XRD) mapping was done by a D8 focusing diffractometer (Bruker AXS, Germany). Fourier transform infrared (FT-IR) spectrograms were recorded with a VERTEX70 spectrometer (Bruker, Germany). The UV spectra were measured by a TU1900 double-beam UV-visible spectrophotometer. A conventional three-electrode cell system was used during the experiments, with a modified glassy carbon electrode (GCE, 4.0 mm diameter) as the working electrode, a platinum wire as the auxiliary electrode, and

Ag/AgCl (saturated KCl solution) as the reference electrode.

## 2. The calculation of the detection limit

The limits of detection are calculated with reference to the literature that has been reported<sup>1</sup>. Parallel determinations were performed on 10 blank samples and the detection limits were calculated according to the following equation.

$$I_L = I_B + k \cdot S_B$$

Where  $I_B$  indicates the average ECL intensity,  $S_B$  is the standard deviation, and  $k$  is a numerical factor chosen according to the signal-to-noise ratio, which is taken as 3 here. The calculated  $I_L$  was substituted into the working curve, and the final detection limit was obtained as 0.3 pg/mL.

## 3. Preparation and storage of serum samples.

Blood samples were provided by the hospital of the University of Jinan. Prior to the experiment, 3 mL of blood samples were centrifuged in a 5 mL centrifuge tube at 4000 rpm/min for 10 min, and the supernatant was the prepared serum sample. The serum samples were stored in a refrigerator at 4 °C until use. For testing, the serum samples were equally divided into several groups, one of which was confirmed by the constructed immunosensor for its concentration. Standards of different concentrations were added to the remaining fractions and their concentrations were determined after thorough mixing.

## 4. Figures and Table

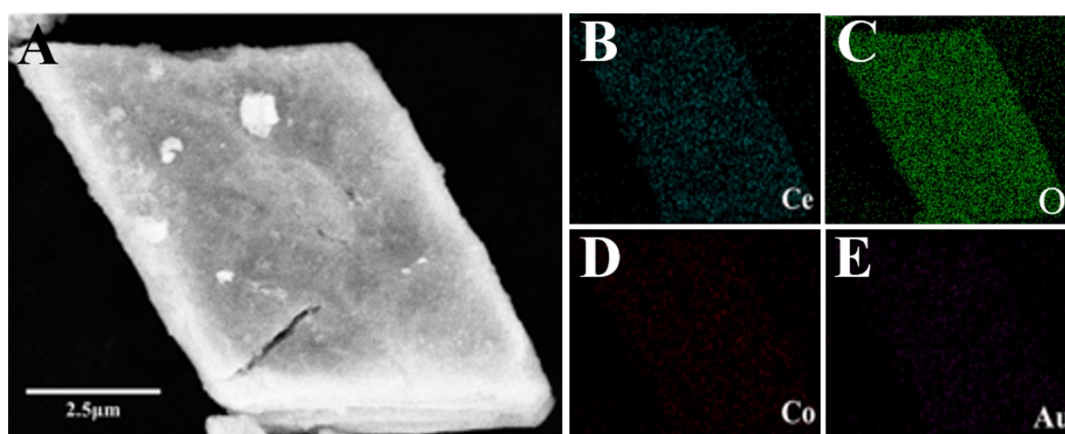

Fig. S1 elemental distribution images of CoCeO<sub>x</sub>@Au; (B) Ce element; (C) O element; (D) Co element; (E) Au element.

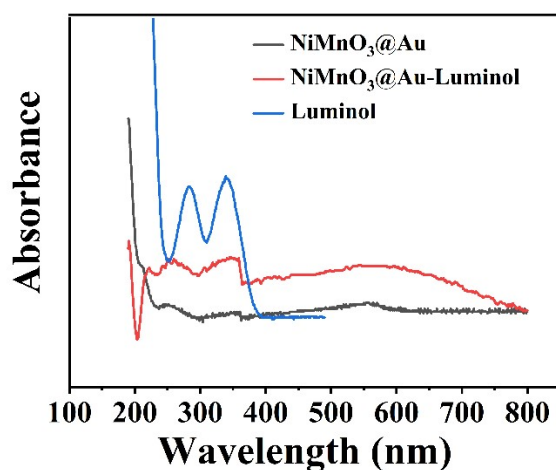

**Fig. S2** UV absorption spectra of NiMnO<sub>3</sub>@Au (black), UV absorption spectra of NiMnO<sub>3</sub>@Au-luminol (red), and UV absorption spectra of luminol (blue)

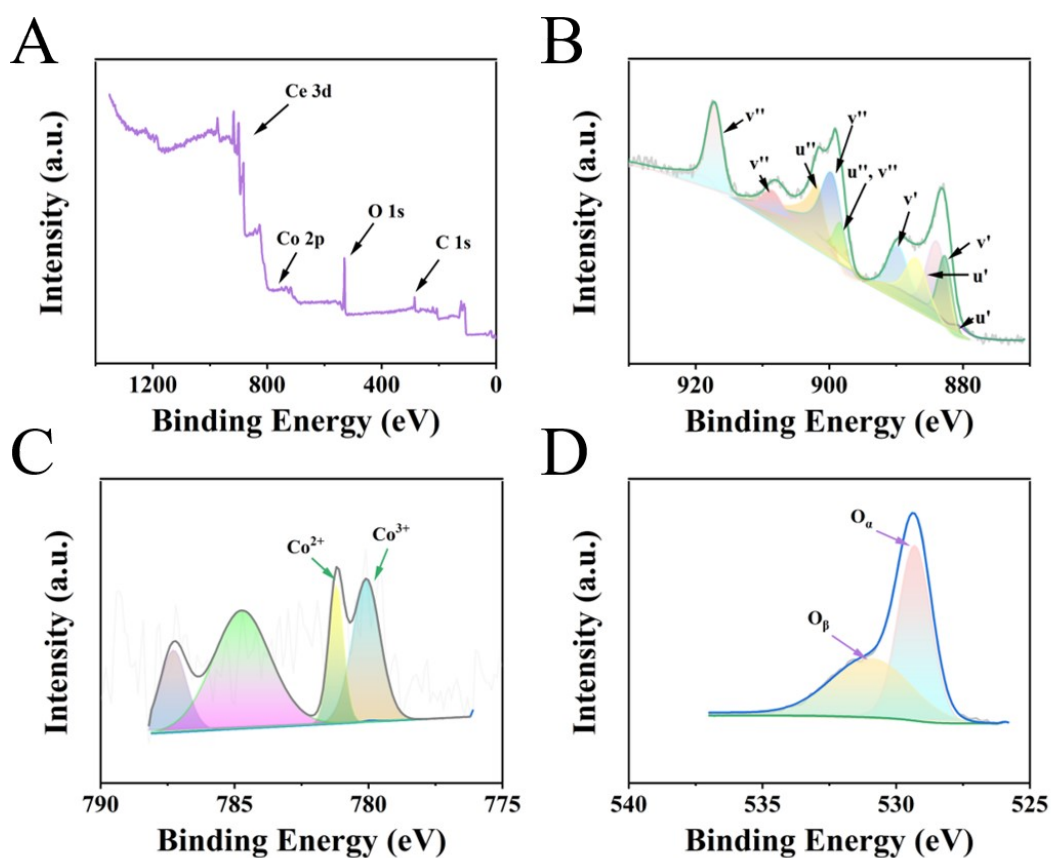

**Fig. S3** XPS spectra of the as-prepared CoCeO<sub>x</sub> composites. (A) Survey XPS spectra; (B) Ce(u': Ce<sup>3+</sup> 3d<sub>3/2</sub>; u'': Ce<sup>3+</sup> 3d<sub>5/2</sub>; v': Ce<sup>4+</sup> 3d<sub>3/2</sub>; v'': Ce<sup>4+</sup> 3d<sub>5/2</sub>) spectra; (C) Co spectra; and (D) O spectra.

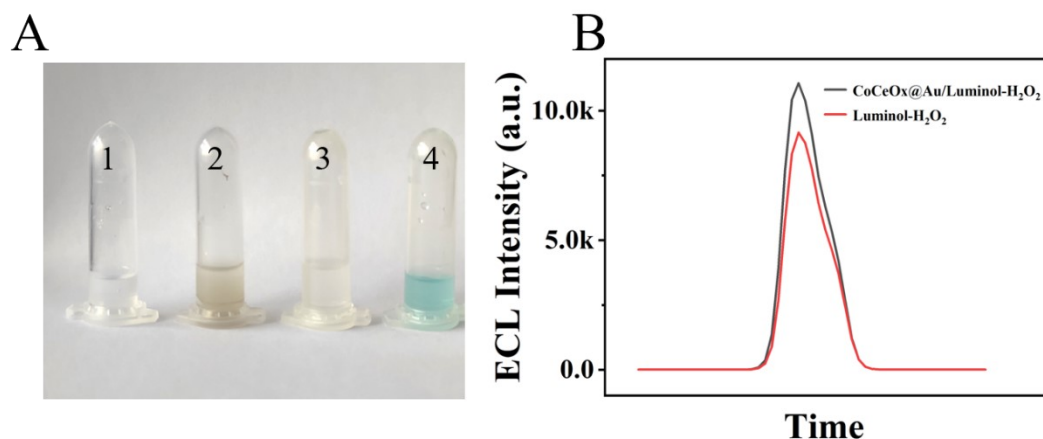

**Fig. S4** (A) Color development reaction: No. 1 TMB solution; No. 2 CoCeO<sub>x</sub> solution; No. 3 color development reaction experiment without H<sub>2</sub>O<sub>2</sub>; No. 4 color development reaction experiment with H<sub>2</sub>O<sub>2</sub>; (B) Graph of the effect of CoCeO<sub>x</sub>@Au on luminol-H<sub>2</sub>O<sub>2</sub> system.

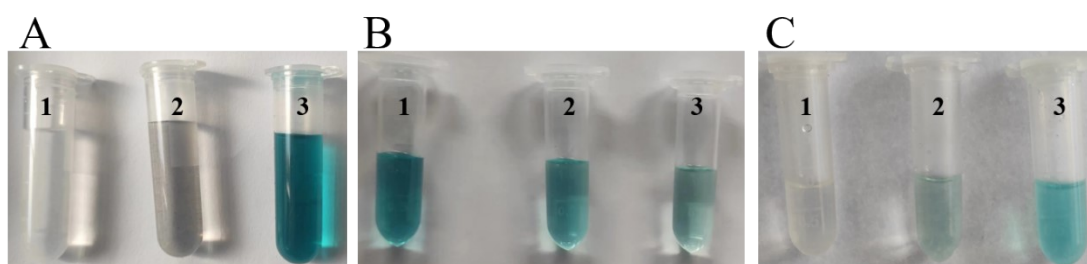

**Fig. S5** (A) Color development reaction: No. 1 TMB solution; No. 2 NiMnO<sub>3</sub> solution; No. 3 TMB+NiMnO<sub>3</sub> solution; (B) Color development reaction: No. 1 color development reaction experiment in air; No. 2 color development reaction experiment after passing 15 min N<sub>2</sub>; No. 3 color development reaction experiment after passing 30 min N<sub>2</sub> for 30 min; (C) Color development reaction: No. 1 TMB solution; No. 2 color development reaction experiment without H<sub>2</sub>O<sub>2</sub> after passing 30 min N<sub>2</sub>; No. 3 color development reaction experiment with H<sub>2</sub>O<sub>2</sub> after passing 30 min N<sub>2</sub>.

100  $\mu$ L acetate buffer (pH = 4.9) was added to 1 mL TMB (1 mM in H<sub>2</sub>O). This was followed by the addition of 500  $\mu$ L of NiMnO<sub>3</sub> dispersion (50  $\mu$ g/mL). The resulting solution was turned into blue in 2 minutes at room temperature.

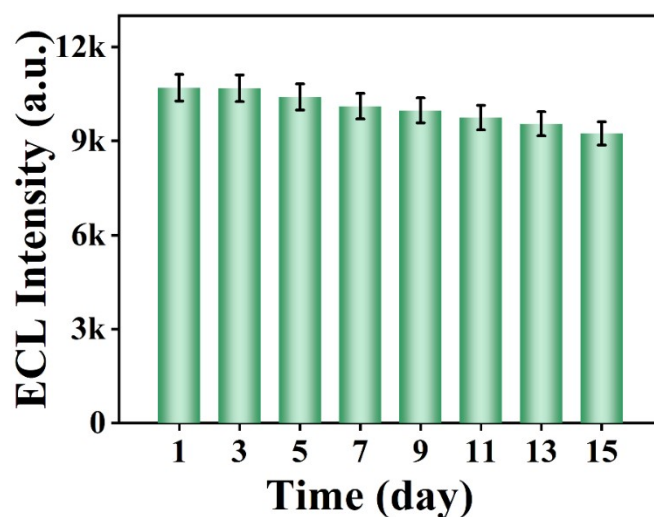

**Fig. S6** long-term Stability of ECL immunosensor

After calculation, the RSD for the first 15 days is 5.26%, and the RSD for the first 7 days is 2.64%, indicating that the storage performance of the immunosensor is well.

**Table S1.** Comparison of the performance of the proposed and referenced immunosensor for CYFRA21-1 detection

| Methods                             | Linear range (ng/mL) | The detection limit (ng/mL) | Reference |
|-------------------------------------|----------------------|-----------------------------|-----------|
| fluorescence analysis               | 0.18–100             | 0.18                        | 2         |
| electrochemical                     | 0.50–200             | 0.18                        | 3         |
| controlled release sensor           | 1.3–160              | 0.79                        | 4         |
| electrochemiluminescent immunoassay | 0.010–100            | 0.0026                      | 5         |
| electrochemical ratiometric method  | 0.00050–50           | 0.00039                     | 6         |
| electrochemiluminescent immunoassay | 0.10–50              | 0.0060                      | 7         |
| electrochemiluminescent immunoassay | 0.0010–150           | 0.00030                     | This work |



## Reference

1. J. Fang, R. Feng, L. Yang, Q. Yue, M. Li, N. Zhang, W. Dan, H. Ma, W. Cao and Q. Wei, *Sens. Actuators, B.*, 2022, **357**, 131443.
2. X.-L. Tao, M.-C. Pan, X. Yang, R. Yuan and Y. Zhuo, *Chin. Chem. Lett.*, 2022, **33**, 4803-4807.
3. H. Yang, J. Bao, D. Huo, Y. Zeng, X. Wang, M. Samalo, J. Zhao, S. Zhang, C. Shen and C. Hou, *Talanta*, 2021, **224**, 121816.
4. F. Lv, M. Wang, H. Ma, L. Hu, Q. Wei and D. Wu, *Sens. Actuators, B.*, 2022, **371**.
5. L. Zhou, L. Yang, C. Wang, H. Jia, J. Xue, Q. Wei and H. Ju, *Talanta*, 2022, **238**, 123047.
6. L. Qu, L. Yang, Y. Li, X. Ren, H. Wang, D. Fan, X. Wang, Q. Wei and H. Ju, *ACS Appl. Mater. Interfaces.*, 2021, **13**, 5795-5802.
7. Y. Wang, Y. Li, X. Zhuang, C. Tian, X. Fu and F. Luan, *Biosens. Bioelectron.*, 2021, **190**, 113371.
